# Supplementary material for: Rheumatoid arthritis decreases risk for Parkinson’s disease: a Mendelian randomization study
Source: PubMed Central journal article supplement (PMC7925660; doi:10.1038/s41531-021-00166-x), 2021-03-02
Supplement: 41531_2021_166_MOESM1_ESM.pdf [file 41531_2021_166_MOESM1_ESM.pdf]

# **Rheumatoid Arthritis Decreases Risk for Parkinson's Disease: a Mendelian Randomization Study**

**Running head:** Rheumatoid arthritis and PD

ChunYu Li<sup>1</sup>, Ruwei Ou<sup>1</sup>, HuiFang Shang<sup>1\*</sup>

<sup>1</sup>Department of Neurology, Laboratory of Neurodegenerative Disorders, National Clinical Research Center for Geriatric, West China Hospital, Sichuan University, Chengdu 610041, China.

\*Corresponding author: HuiFang Shang

Affiliation: Department of Neurology, Laboratory of Neurodegenerative Disorders, National Clinical Research Center for Geriatric, West China Hospital, Sichuan University, Chengdu 610041, China

Postal address: No.37, Guoxue Lane, 610041, Chengdu, Sichuan, China

E-mail: hfshang2002@126.com

Telephone Number: 0086-18980602127

**Supplementary Figure 1. Assumptions in Mendelian randomization analysis.**

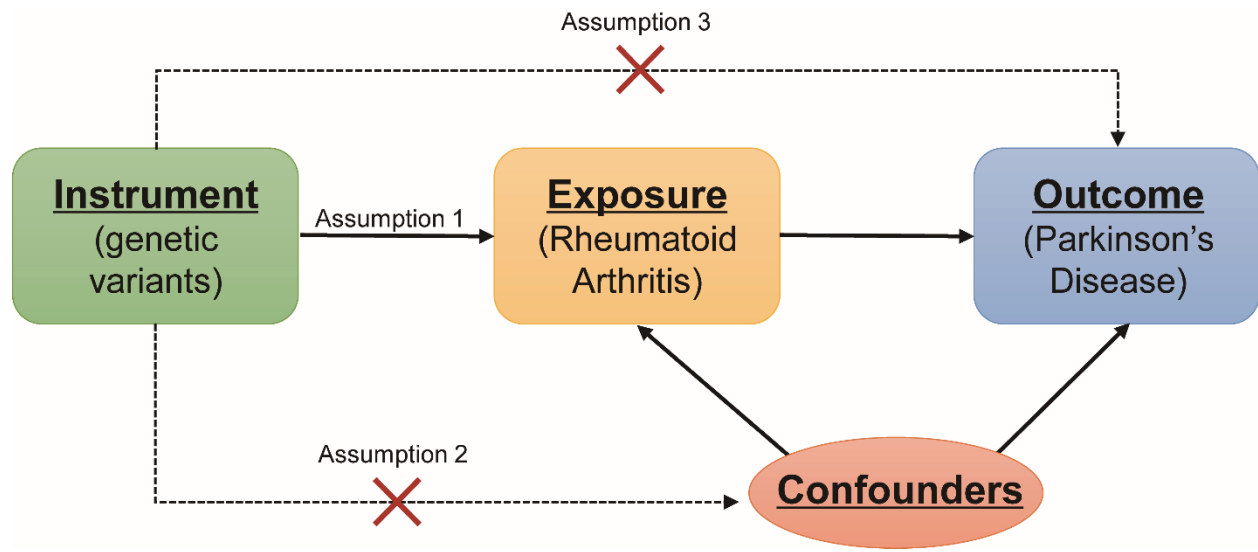

Broken lines represent potential pleiotropic or direct causal effects between variables that would violate Mendelian randomization assumptions. Assumption 1: Genetic variants are associated with the rheumatoid arthritis; Assumption 2: Genetic variants are not associated with confounders like smoking and body mass index; Assumption 3: Genetic variants influence the outcome only through the exposure

**Supplementary Table 1. Summary data from all GWAS used in current study**

| <b>Disease</b>                   | <b>Cases</b> | <b>Controls</b> | <b>Ethnics</b> | <b>SNPs</b> | <b>Pubmed ID</b> |
|----------------------------------|--------------|-----------------|----------------|-------------|------------------|
| discovery rheumatoid arthritis   | 13,838       | 33,742          | EUR            | 112,654     | 23143596         |
| replication rheumatoid arthritis | 5,539        | 20,169          | EUR            | 2,556,272   | 20453842         |
| Parkinson's disease              | 33,647       | 449,056         | EUR            | 17,510,617  | 31701892         |

EUR, European; SNP, single nucleotide polymorphism; GWAS, genome-wide association study; PD summary statistics were from Nalls et al 2019 excluding participants from 23andMe Inc.

**Supplementary Table 2. Summary information for instrumental variables of rheumatoid arthritis in discovery phase**

| SNP        | Genomic position (GRCh37) | Gene       | alleles | rheumatoid arthritis |        |       | Parkinson's disease |        |       | F statistics |
|------------|---------------------------|------------|---------|----------------------|--------|-------|---------------------|--------|-------|--------------|
|            |                           |            |         | P value              | Beta   | SE    | P value             | Beta   | SE    |              |
| rs6679677  | 1:114303808               | PHTF1      | A/C     | 1.23E-61             | 0.466  | 0.028 | 0.197               | -0.038 | 0.029 | 274.43       |
| rs2228145  | 1:154426970               | IL6R       | C/A     | 1.32E-08             | -0.109 | 0.019 | 0.261               | 0.019  | 0.017 | 32.31        |
| rs2240339  | 1:17674108                | PADI4      | T/C     | 1.36E-08             | -0.112 | 0.020 | 0.860               | 0.003  | 0.018 | 32.25        |
| rs8026898  | 15:69991417               | PCAT29     | A/G     | 2.22E-09             | 0.125  | 0.021 | 0.928               | -0.002 | 0.019 | 35.77        |
| rs10209110 | 2:100672692               | AFF3       | T/C     | 1.13E-08             | -0.106 | 0.019 | 0.069               | 0.031  | 0.017 | 32.61        |
| rs13426947 | 2:191933254               | STAT4      | A/G     | 7.19E-10             | 0.143  | 0.023 | 0.947               | -0.001 | 0.021 | 37.97        |
| rs17630466 | 4:26086569                | LINC02357  | G/A     | 2.45E-10             | 0.127  | 0.020 | 0.921               | 0.002  | 0.020 | 40.07        |
| rs71624119 | 5:55440730                | ANKRD55    | A/G     | 5.59E-20             | -0.207 | 0.023 | 0.761               | -0.006 | 0.021 | 83.76        |
| rs6920220  | 6:138006504               | intergenic | A/G     | 1.84E-10             | 0.141  | 0.022 | 0.090               | -0.035 | 0.021 | 40.63        |
| rs9262218  | 6:30797215                | LINC00243  | T/C     | 1.22E-10             | -0.447 | 0.069 | 0.696               | 0.018  | 0.045 | 41.43        |
| rs3129886  | 6:32410576                | HLA-DRA    | C/T     | 3.20E-79             | 0.441  | 0.023 | 0.817               | -0.005 | 0.022 | 355.15       |
| rs660895   | 6:32577380                | intergenic | G/A     | 1.00E-200            | 0.818  | 0.021 | 5.80E-07            | -0.131 | 0.026 | 1479.74      |
| rs3129294  | 6:33084671                | HLA-DPB2   | C/A     | 6.96E-19             | -0.177 | 0.020 | 0.499               | 0.015  | 0.022 | 78.78        |
| rs2812378  | 9:34710260                | CCL21      | A/G     | 1.31E-08             | -0.110 | 0.019 | 0.212               | 0.026  | 0.021 | 32.32        |

SNP: single nucleotide polymorphism, beta: SNP effect size, SE: standard error of the SNP effect size.

All the selected instruments together explain about 2.51% phenotypic variation of rheumatoid arthritis risk at the observed scale.

**Supplementary Table 3. Summary information for instrumental variables of rheumatoid arthritis in replication phase**

| SNP        | Genomic position (GRCh37) | Gene       | alleles | rheumatoid arthritis |        |       | Parkinson's disease |        |       | F statistics |
|------------|---------------------------|------------|---------|----------------------|--------|-------|---------------------|--------|-------|--------------|
|            |                           |            |         | P value              | Beta   | SE    | P value             | Beta   | SE    |              |
| rs6679677  | 1:114303808               | PHTF1      | A/C     | 4.39E-70             | 0.663  | 0.038 | 0.197               | -0.038 | 0.029 | 302.43       |
| rs3087243  | 2:204738919               | CTLA4      | A/G     | 2.24E-08             | -0.139 | 0.023 | 0.083               | 0.029  | 0.017 | 35.20        |
| rs4810485  | 20:44747947               | CD40       | G/T     | 5.69E-09             | 0.163  | 0.030 | 0.386               | -0.017 | 0.019 | 29.26        |
| rs10040327 | 5:55435220                | ANKRD55    | A/C     | 6.65E-11             | -0.288 | 0.044 | 0.475               | -0.022 | 0.030 | 42.68        |
| rs6920220  | 6:138006504               | intergenic | A/G     | 2.49E-12             | 0.199  | 0.029 | 0.090               | -0.035 | 0.021 | 46.04        |
| rs9268145  | 6:32257284                | TSBP1-AS1  | G/T     | 1.00E-200            | 1.058  | 0.027 | 2.52E-05            | -0.107 | 0.025 | 1581.71      |
| rs9784876  | 6:32788878                | TAP2       | A/C     | 2.40E-46             | 0.668  | 0.047 | 0.833               | 0.008  | 0.037 | 202.00       |
| rs460568   | 6:33232025                | VPS52      | T/C     | 3.81E-16             | 0.262  | 0.031 | 0.477               | 0.017  | 0.024 | 69.65        |

SNP: single nucleotide polymorphism, beta: SNP effect size, SE: standard error of the SNP effect size.

All the selected instruments together explain about 2.04% phenotypic variation of rheumatoid arthritis risk at the observed scale.
